## CORRECTION

# Correction: The Human Footprint in Mexico: Physical Geography and Historical Legacies

Charlotte González-Abraham, Exequiel Ezcurra, Pedro P. Garcillán, Alfredo Ortega-Rubio, Melanie Kolb, Juan E. Bezaury Creel

The legends for Figs [3](#) and [4](#) have been incorrectly switched. Please view Figs [3](#) and [4](#) with their correct legends here.

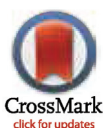

## OPEN ACCESS

**Citation:** González-Abraham C, Ezcurra E, Garcillán PP, Ortega-Rubio A, Kolb M, Creel JEB (2015) Correction: The Human Footprint in Mexico: Physical Geography and Historical Legacies. PLoS ONE 10 (5): e0128055. doi:10.1371/journal.pone.0128055

**Published:** May 4, 2015

**Copyright:** © 2015 González-Abraham et al. This is an open access article distributed under the terms of the [Creative Commons Attribution License](#), which permits unrestricted use, distribution, and reproduction in any medium, provided the original author and source are credited.

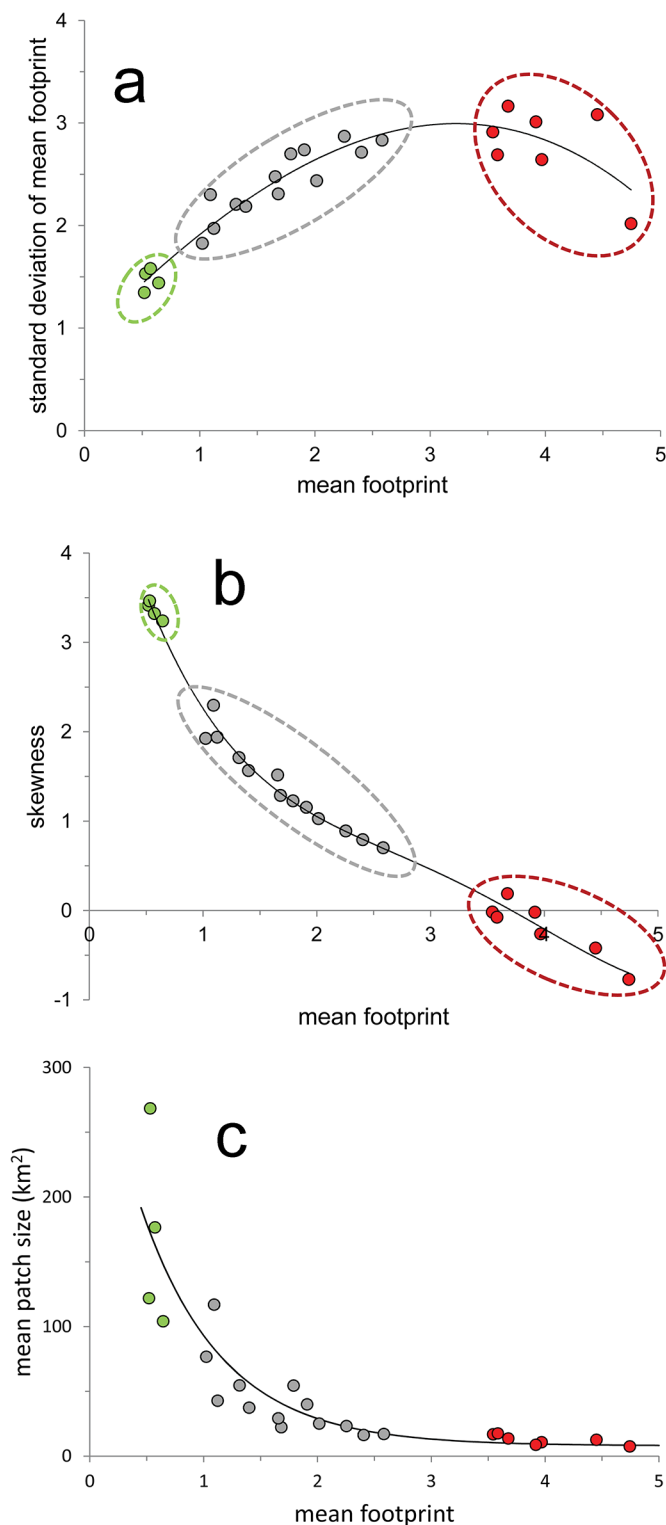

**Fig 3. Statistical properties of the ecoregional human footprint.** (a) Relationship between the mean human footprint in each of 24 Mexican ecoregions, and the standard deviation of their footprint values ( $r^2 = 0.99$ ;  $P < 0.00001$ ). (b) Relationship between mean human footprint in each ecoregion and the skewness of the distribution of footprint values ( $r^2 = 0.87$ ;  $P < 0.00001$ ). (c) Relationship between mean human footprint and the mean patch size of low footprint area in each ecoregion ( $r^2 = 0.84$ ;  $P < 0.00001$ ; in all cases the fitted curve was obtained using polynomial regression).

doi:10.1371/journal.pone.0128055.g001

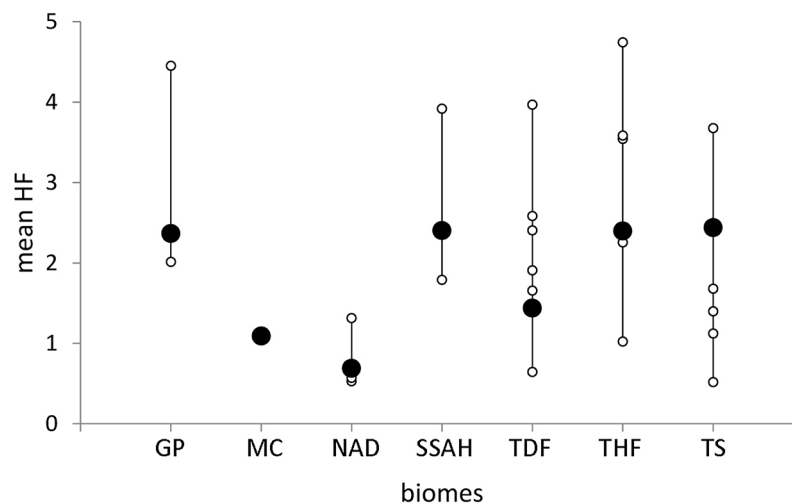

**Fig 4. Ecoregional footprint nested within biomes.** Large differences in ecoregional *HF* values (white points) were observed within most biomes (black points). Biomes names as follow Great Plains (GP), Mediterranean California (MC), North American Deserts (NAD), Southern Semi-Arid Highlands (SSAH), Temperate Sierras (TS), Tropical Dry Forests (TDF) and Tropical Humid Forests (THF).

doi:10.1371/journal.pone.0128055.g002

## Reference

1. González-Abraham C, Ezcurra E, Garcillán PP, Ortega-Rubio A, Kolb M, Bezaury Creel JB. (2015) The Human Footprint in Mexico: Physical Geography and Historical Legacies. PLoS ONE 10(3): e0121203. doi: [10.1371/journal.pone.0121203](https://doi.org/10.1371/journal.pone.0121203) PMID: [25803839](https://pubmed.ncbi.nlm.nih.gov/25803839/)
